# Supplementary material for: New insights onPhyllanthus reticulatusPoir. leaves and stem bark extracts: UPLC-ESI-TOF-MS profiles, and biopharmaceutical andin silicoanalysis
Source: Royal Society of Chemistry journal article supplement (doi:10.1039/d1nj03621a), 2021-01-01
Supplement: d1nj03621a1.pdf [file d1nj03621a1.pdf]

Table S1. Upregulated and downregulated mRNA by five of the main compounds of *P. reticulatus*.

| mRNA        | Erythrin      | Gardenoside | Phlorizin | Sesamoside | Veracylglycan |
|-------------|---------------|-------------|-----------|------------|---------------|
| Upregulated | PON1          | KDEL1       | TCF12     | KDEL1      | FTL           |
|             | TCF12         | PGM2        | KDEL1     | PGM2       | TCF12         |
|             | OGG1          | TCF12       | PGM2      | TCF12      | KDEL1         |
|             | FTL           | SMPD1       | EID1      | FTL        | PGM2          |
|             |               | FTL         | SMPD1     | SMPD1      | SMPD1         |
|             |               | RPS6KA3     | FTL       | RPS6KA3    | EID1          |
|             |               | SFRP1       | NOTCH1    |            | RPS6KA3       |
|             |               | ENC1        | RPS6KA3   |            | LST1          |
|             |               | CASP2       | PGR       |            | CASP2         |
|             |               | MT1L        | MT1L      |            | GATA1         |
|             |               |             | RRM2B     |            |               |
|             |               |             | CASP2     |            |               |
|             | Downregulated | GSS         | MAPK8     | MAPK8      | MAPK8         |
| ITGAV       |               | SDC4        | MFAP4     | SDC4       | MAPK8         |
| CAPRIN1     |               | APTX        | DMXL1     | APTX       | ADAM19        |
| TEFM        |               | RSBN1       | ADAM19    | RSBN1      | SDC4          |
| TRAF5       |               | ADAM19      | SDC4      | ADAM19     | APTX          |
| WWP2        |               | MFAP4       | OLFML1    | EVI2B      | RSBN1         |
|             |               | EVI2B       | APTX      | OSBP2      | EVI2B         |
|             |               | OSBP2       | RSBN1     | MFAP4      | DSPP          |
|             |               | ABCA13      | ABCA13    | DSPP       | SYMPK         |
|             |               | ABCC13      | ABCC13    | ABCA13     | EFNA3         |
|             |               | TMEM59L     | TMEM59L   | ABCC13     | OSBP2         |
|             |               | DSPP        | SYMPK     | TMEM59L    | UBE2M         |
|             |               | EFNA3       | EFNA3     | SYMPK      | ABCA13        |
|             |               | SYMPK       | PDZK1     | UBE2M      | ABCC13        |
|             |               | UBE2M       | EVI2B     | LRP6       | TMEM59L       |
|             |               | OLFML1      | LRP6      | DIAPH2     | OLFML1        |
|             |               | DIAPH2      | OSBP2     | EFNA3      | CXCL10        |
|             |               | LRP6        | UBE2M     | PSMD3      | DIAPH2        |
|             |               | PSMD3       | CXCL10    | PACSIN2    | PACSIN2       |
|             |               | DMXL1       | DIAPH2    | CXCL10     | LRP6          |
|             |               | PACSIN2     | DSPP      | OLFML1     | PSMD3         |
|             |               | CXCL10      | PACSIN2   |            | DMXL1         |
|             |               |             | PSMD3     |            | PDZK1         |
|             |               |             | DNMT1     |            |               |
|             |               |             | TUBGCP3   |            |               |
